# Supplementary material for: Molecular and metabolic insights into floral scent biosynthesis during flowering in Dendrobium chrysotoxum
Source: Front Plant Sci. 2022 Nov 28;13:1030492. doi: 10.3389/fpls.2022.1030492 (PMC9742519; doi:10.3389/fpls.2022.1030492)
Supplement: Supplementary file 6 [file Table_2.xlsx]

## Sheet: TABLES1
Supplementary Table 2. All detected VOCs in floral organs of D. chrysotoxum
Index	Compounds	CAS	NIST RI	Bd	Hf	Fb
Terpenoids
XMW0013	Tricyclene	508-32-7	925	-	+	+
KMW0148	α-Pinene	80-56-8	937	+	+	+
D264	Dihydromyrcene	2436-90-0	946	+	+	+
WMW0201	7,7-dimethyl-2-methylene-Bicyclo[221]heptane	471-84-1	950	+	+	+
XMW0889	4-methylene-1-(1-methylethyl)-Bicyclo[310]hex-2-ene	36262-09-6	956	+	+	+
KMW0178	Sabinene	3387-41-5	972	-	+	+
XMW0678	1,5,5,6-tetramethyl-1,3-Cyclohexadiene	514-94-3	976	-	+	+
XMW0521	2-methyl-6-methylene-1,7-Octadiene	1686-30-2	984	+	+	+
KMW0181	2,3-Dehydro-1,8-cineole	92760-25-3	992	+	+	+
XMW0902	2,6-Dimethyl-2-trans-6-octadiene	2609-23-6	993	+	+	+
KMW0198	α-Phellandrene	99-83-2	1006	+	+	+
KMW0223	Terpinene	99-86-5	1012	+	+	+
XMW0127	o-Cymene	527-84-4	1022	+	+	+
KMW0217	D-Limonene	5989-27-5	1030	+	+	+
KMW0218	Eucalyptol	470-82-6	1030	+	+	+
WMW0215	β-Ocimene	13877-91-3	1037	+	+	+
KMW0235	Ocimene mixture of isomers	3338-55-4	1038	+	+	+
WMW0040	trans-β-Ocimene	3779-61-1	1049	+	+	+
KMW0259	γ-Terpinene	99-85-4	1060	-	+	+
KMW0254	3,3,6-trimethyl-1,5-Heptadien-4-one	546-49-6	1062	+	+	+
KMW0250	Dihydromyrcenol	18479-58-8	1064	+	+	+
KMW0257	(1α,2β,5α)-2-methyl-5-(1-methylethyl)-Bicyclo[310]hexan-2-ol	15537-55-0	1070	+	+	+
KMW0296	Terpinolene	586-62-9	1088	+	+	+
D197	α-Pinene oxide	1686-14-2	1095	+	+	+
NMW0034	Fenchone	1195-79-5	1096	+	+	+
D407	(S)-(-)-Ipsenol	35628-05-8	1097	+	+	+
KMW0291	Linalool	78-70-6	1099	+	+	+
WMW0194	Thujone	546-80-5	1103	+	+	+
KMW0302	Rose oxide	3033-23-6	1110	+	+	+
XMW0719	p-Mentha-1,5,8-triene	21195-59-5	1111	+	+	+
NMW0041	(E)-4,8-Dimethylnona-1,3,7-triene	19945-61-0	1116	+	+	+
XMW0780	E,E-2,6-Dimethyl-1,3,5,7-octatetraene	460-01-5	1131	-	+	+
D370	(Z)-2,2-Dimethyl-3-(3-methylpenta-2,4-dien-1-yl)oxirane	33281-83-3	1133	+	+	+
KMW0325	1-methyl-4-(1-methylethyl)-3-Cyclohexen-1-ol	586-82-3	1137	+	+	+
KMW0327	trans-Limonene oxide	4959-35-7	1138	+	+	+
D440	1-methyl-4-(1-methylethyl)-cis-Cyclohexanol	3901-95-9	1138	+	+	+
WMW0042	Pinocarveol	5947-36-4	1138	+	+	+
KMW0328	(+)-(E)-Limonene oxide	6909-30-4	1139	+	+	+
WMW0159	Verbenone	13040-03-4	1140	+	+	+
NMW0052	2-Methyl-6-methyleneocta-2,7-dien-4-one	539-70-8	1145	+	+	+
KMW0329	Camphor	76-22-2	1145	+	+	+
XMW0654	1-(1,4-dimethylcyclohex-3-en-1-yl)Ethan-1-one	43219-68-7	1149	-	+	+
KMW0335	β-Terpineol	138-87-4	1153	+	+	+
KMW0313	Menthone	89-80-5	1154	+	+	+
XMW0913	cis-Chrysanthenol	55722-60-6	1162	+	+	+
WMW0005	Pinocarvone	30460-92-5	1164	+	+	+
NMW0064	Menthofurane	494-90-6	1165	-	+	+
D439	trans-1-methyl-4-(1-methylethyl)-Cyclohexanol	3901-93-7	1167	+	+	+
XMW0531	(1α,2β,5α)-2,6,6-trimethyl-Bicyclo[311]heptan-3-one	15358-88-0	1173	+	+	+
WMW0015	4-Terpinenol	562-74-3	1177	+	+	+
WMW0041	Isopinocarveol	6712-79-4	1178	-	+	+
D307	Isopinocampheol	27779-29-9	1179	-	+	+
WMW0011	5-methyl-2-(1-methylethenyl)-Cyclohexanone	529-00-0	1179	-	+	+
KMW0408	m-Methylbenzyl alcohol	1197-01-9	1183	-	+	+
NMW0071	L-α-Terpineol	10482-56-1	1190	+	+	+
NMW0073	(-)-Myrtenal	564-94-3	1193	+	+	+
KMW0386	cis-Dihydrocarvone	3792-53-8	1195	+	+	+
XMW1138	7-methyl-3-methylene-6-Octen-1-ol	13066-51-8	1195	+	+	+
NMW0075	γ-Terpineol	586-81-2	1197	+	+	+
KMW0370	2-Methylisoborneol	2371-42-8	1198	+	+	+
XMW0730	o-Mentha-1(7),8-dien-3-ol	15358-81-3	1201	+	+	+
NMW0082	(-)-trans-Isopiperitenol	74410-00-7	1210	-	+	+
XMW0766	5-methyl-2-(1-methylethylidene)-Cyclohexanone	15932-80-6	1212	-	-	+
NMW0089	(R)-(+)-β-Citronellol	1117-61-9	1220	-	-	+
NMW0092	Neodihydrocarveol	18675-33-7	1226	+	+	+
NMW0093	D-Verbenone	18309-32-5	1228	+	+	+
KMW0430	Citronellol	106-22-9	1228	+	+	+
KMW0432	Citral	106-26-3	1240	+	+	+
NMW0101	Ascaridole	512-85-6	1244	+	+	+
KMW0453	Linalyl acetate	115-95-7	1257	+	+	+
NMW0104	Geraniol	624-15-7	1260	+	+	+
XMW0164	Theaspirane	36431-72-8	1302	+	+	+
XMW0640	(1R,2S,5S)-rel- 2-ethenyl-2,6,6-trimethyl-1-(1-methylethenyl)-Bicyclo[3.2.0]heptane	871660-95-6	1314	+	+	+
WMW0004	Ylangene	14912-44-8	1372	+	+	+
XMW0143	α-Cedrene	469-61-4	1411	+	+	+
XMW1180	(1R,1aR,2aS,5R,6R,6aS,7aS)-1,6,6a-trimethyldecahydro-1,2a-methanocyclopropa[b]naphthalen-5-ol	860769-47-7	1431	+	+	+
XMW0380	Calarene	17334-55-3	1432	+	+	+
KMW0555	trans-α-Bergamotene	13474-59-4	1435	+	+	+
NMW0211	Perillic Acid	7694-45-3	1484	+	+	+
KMW0556	β-Selinene	17066-67-0	1486	+	+	+
XMW0548	10,10-dimethyl-2,6-bis(methylene)-[1S-(1R*,9S*)]-Bicyclo[720]undecane	136296-38-3	1489	+	+	+
KMW0582	β-Guaiene	88-84-6	1490	+	+	+
WMW0051	β-Ionone	14901-07-6	1491	+	+	+
XMW0700	4a,8-Dimethyl-2-(prop-1-en-2-yl)-1,2,3,4,4a,5,6,7-octahydronaphthalene	103827-22-1	1492	+	+	+
WMW0003	Eremophilene	10219-75-7	1494	+	+	+
D328	(5R,10R)-10-Methyl-6-methylene-2-(propan-2-ylidene)spiro[45]dec-7-ene	28908-27-2	1495	+	+	+
KMW0595	Zingiberene	495-60-3	1495	+	+	+
KMW0604	Bicyclogermacrene	24703-35-3	1495	+	+	+
XMW0157	Epishyobunone	39020-72-9	1498	+	+	+
KMW0606	α-Muurolene	10208-80-7	1499	+	+	+
Heterocyclic compound
D196	Thiazole	288-47-1	735	+	+	+
NMW0747	Pyrrole	109-97-7	755	+	+	+
XMW0115	5-Methyloxazolidine	58328-22-6	795	+	+	+
KMW0499	4-Methylthiazole	693-95-8	818	+	+	+
XMW0430	2-Piperidinimine	22780-54-7	824	+	+	+
XMW0517	3-ethyl-Thiophene	1795-01-3	869	+	+	+
KMW0097	2-Methyl-3-furanthiol	28588-74-1	870	+	+	+
NMW0772	1H-Pyrazole	288-13-1	887	+	+	+
XMW1424	1H-1,2,3-Triazole	288-36-8	927	-	+	+
XMW0651	2,3-dimethyl-Pyridine	583-61-9	943	+	+	+
XMW0910	1-acetyl-1H-Imidazole	2466-76-4	950	+	+	+
XMW0573	1,5-Diazabicyclo[310]hexane	13090-31-8	951	+	+	+
KMW0539	5-ethyl-2(5H)-Furanone	2407-43-4	966	+	+	+
XMW0149	4,5-dihydro-5,5-dimethyl-1H-Pyrazole	4320-85-8	983	+	+	+
XMW0522	3-propyl Pyridine	4673-31-8	986	+	+	+
XMW1454	Isomaltol	3420-59-5	989	+	+	+
KMW0182	2-Pentylfuran	3777-69-3	993	+	+	+
WMW0081	cis-2-(2-Pentenyl)furan	70424-13-4	1002	+	+	+
XMW0578	2-butyltetrahydro-Furan	1004-29-1	1004	+	+	+
KMW0183	2-ethyl-5-methyl-Pyrazine	13360-64-0	1005	+	+	+
XMW0483	1H-Pyrrole-2-carboxAldehyde	1003-29-8	1012	+	+	+
XMW0042	1,2-dihydro-3H-1,2,4-Triazol-3-one	930-33-6	1012	+	+	+
XMW0898	4-Isobutylpyrimidine	98489-37-3	1015	+	+	+
KMW0188	2-Methyl-1,3-dithiacyclopentane	5616-51-3	1026	+	+	+
XMW0267	2-Ethylpiperidine	1484-80-6	1026	+	+	+
XMW0236	5-ethenyl-4-methyl-Thiazole	1759-28-0	1027	+	+	+
XMW0028	2,3,4,5-tetrahydro-6-propyl-Pyridine	1604-01-9	1028	+	+	+
XMW1467	1,3,5-trimethyl-1H-Pyrazole	1072-91-9	1032	+	+	+
XMW0289	2-Acetyl-5-methylfuran	1193-79-9	1039	+	+	+
KMW0236	2-Isobutylthiazole	18640-74-9	1043	+	+	+
NMW0021	2-PyridinemethanAmine	3731-51-9	1054	+	+	+
KMW0255	3-Methoxy-2,5-dimethylpyrazine	19846-22-1	1057	+	+	+
XMW1203	dihydro-3-methyl-2,5-Furandione	4100-80-5	1057	+	+	+
KMW0244	2-methyl-5-(1-methylethyl)-Pyrazine	13925-05-8	1059	+	+	+
D364	2-Ethoxy-3-methylpyrazine	32737-14-7	1065	+	+	+
KMW0275	cis-α,α,5-trimethyl-5-vinyltetrahydrofuran-2-methanol	5989-33-3	1074	+	+	+
XMW1332	octahydro-2,2'-Bifuran	1592-33-2	1079	+	+	+
XMW1286	1H-Imidazole-4-methanol	822-55-9	1080	+	+	+
XMW1309	2，3，5，6-Pyrazine tetramethyl	1124-11-4	1088	+	+	+
KMW0269	2,3-Dimethyl-5-ethylpyrazine	15707-34-3	1090	-	+	+
KMW0278	1-(2-thienyl) Ethanone	88-15-3	1092	+	+	+
NMW0031	Hygrine	496-49-1	1092	+	+	+
XMW0168	3-Butylthiophene	34722-01-5	1093	+	+	+
NMW0033	2(1H)-Pyridinone	142-08-5	1094	+	+	+
WMW0176	tetrahydro-6-methyl-2H-Pyran-2-one	823-22-3	1095	+	+	+
XMW1429	1-(2-Hydroxyethyl)-1,2,4-triazole	3273-14-1	1095	+	+	+
XMW0644	2-propyl-1H-Imidazole	50995-95-4	1095	+	+	+
XMW0532	3,5-dimethyl-1H-Pyrazole-1-carboximidamide	22906-75-8	1096	+	+	+
KMW0286	2-methoxy-3-(1-methylethyl)-Pyrazine	25773-40-4	1097	+	+	+
XMW0412	3-Acetyl-2,5-dimethyl furan	10599-70-9	1099	+	+	+
NMW0036	1-ethenyl-2-Pyrrolidinone	88-12-0	1102	+	+	+
KMW0266	2-Thiophenemethanethiol	6258-63-5	1105	+	+	+
KMW0295	1-(4,5-dihydro-2-thiazolyl)-Ethanone	29926-41-8	1106	+	+	+
XMW0606	2-butyl-2-ethyl-1,3-Dioxolane	935-49-9	1110	+	+	+
XMW0599	2,2,6-Trimethyl-4H-1,3-dioxin-4-one	5394-63-8	1140	+	+	+
XMW0362	tetrahydro-4,6,6-trimethyl-2H-Pyran-2-one	20628-36-8	1141	+	+	+
KMW0431	5H-5-Methyl-6,7-dihydrocyclopentapyrazine	23747-48-0	1144	-	+	+
XMW0914	1-(1H-pyrazol-4-yl)-Ethanone	25016-16-4	1156	+	+	+
NMW0059	4-Aminopyridine	504-24-5	1158	+	+	+
KMW0351	2,3-diethyl-5-methyl-Pyrazine	18138-04-0	1158	+	+	+
XMW0445	6-Ethyl-5,6-dihydro-2H-pyran-2-one	19895-35-3	1160	+	+	+
D365	2-Acetyl-3-ethylpyrazine	32974-92-8	1168	+	+	+
KMW0277	2-pentyl-Thiophene	4861-58-9	1170	+	+	+
XMW0689	1-(3,5-dimethylpyrazinyl)-Ethanone,	54300-08-2	1174	-	+	+
XMW0487	6-nitro-2-Picoline	18368-61-1	1183	-	+	+
D323	2-methyl-3-(methylthio)-Pyrazine	2882-20-4	1184	-	+	+
XMW0442	βhistine	5638-76-6	1185	-	+	+
D81	2-Furanpropanoic acid, ethyl ester	10031-90-0	1192	+	+	+
KMW0383	5-ethyl-3-hydroxy-4-methyl-2(5H)-Furanone	698-10-2	1195	+	+	+
XMW1064	(1α,4α,4aα,5aα)-4,4a,5,5a-tetrahydro-6,6-dimethyl-1,4-Methano-1H-Cyclopropa[d]pyridazine	109746-10-3	1225	+	+	+
XMW0309	2,2,5-methyl-Piperidin-3-one	103634-57-7	1232	+	+	+
XMW0441	3-chloro-1H-1,2,4-Triazole	6818-99-1	1237	+	+	+
NMW0099	Quinoline	91-22-5	1238	+	+	+
D191	2-Hexanoylfuran	14360-50-0	1239	+	+	+
XMW0223	3-ethyl-4-methyl-1H-Pyrrole-2,5-dione	20189-42-8	1239	+	+	+
D188	Pyrazinamide	98-96-4	1250	+	+	+
XMW0740	3-Methyl-pyrrolo(2,3-b)pyrazine	20321-99-7	1252	-	+	+
XMW0448	1,2,4,5-Tetrazine-3,6-diAmine	19617-90-4	1279	+	+	+
w19	tetrahydro-6-propyl-2H-Pyran-2-one	698-76-0	1288	+	+	+
XMW0533	3-Methylbenzothiophene	1455-18-1	1315	+	+	+
XMW0702	2-(3-Thienyl)pyridine	21298-55-5	1362	+	+	+
XMW1239	2-heptyl-1,3-Dioxepane	61732-92-1	1475	+	+	+
NMW0210	7-hydroxy-6-methyl-Furo[3,4-c]pyridin-1(3H)-one	4753-19-9	1484	+	+	+
XMW1091	5-[(tetrahydro-2H-pyran-2-yl)oxy]-1-Pentanol	76102-74-4	1486	+	+	+
NMW0212	1,3-dihydro-2H-Indol-2-one	59-48-3	1487	+	+	+
NMW0213	Nicotyrine	487-19-4	1488	+	+	+
D274	3-methyl-2H-1-Benzopyran-2-one	2445-82-1	1490	+	+	+
NMW0217	(1S-cis)-2,3,5,7a-tetrahydro-1-hydroxy-1H-Pyrrolizine-7-methanol	520-63-8	1495	+	+	+
WMW0050	(R)-5,6,7,7a-tetrahydro-4,4,7a-trimethyl-2(4H)-Benzofuranone	17092-92-1	1532	+	+	+
Ester
KMW0061	Isobutyl acetate	110-19-0	772	+	+	+
XMW1195	3-methyl-3-nitroso-Butanoic acid methyl ester	49680-44-6	814	+	+	+
XMW0881	2-Butenoic acid-3-methyl-methyl ester	924-50-5	842	+	+	+
XMW0180	2-Propenoic acid, 2-methoxyethyl ester	3121-61-7	851	+	+	+
KMW0094	3-methyl-Butanoic acid ethyl ester	108-64-5	854	+	+	+
NMW0766	2-Propenoic acid butyl ester	141-32-2	861	+	+	+
D357	1-(dimethylamino)-2-Propanol acetate (ester)	32188-28-6	869	+	+	+
D371	(Z)-3-Hexen-1-ol formate	33467-73-1	920	+	+	+
KMW0144	Hexanoic acid methyl ester	106-70-7	925	-	-	+
NMW0782	2-methyl-2-Butenoic acid ethyl ester	55514-48-2	937	-	+	+
XMW0887	2-methyl propyl ester-Butanoic acid	37064-20-3	946	+	+	+
XMW1292	2-methylpropyl ester Butanoic acid	539-90-2	954	+	+	+
XMW0574	4-Penten-1-ol propanoate	30563-30-5	974	+	+	+
XMW1117	2-Propenoic acid pentyl ester	2998-23-4	974	+	+	+
w36	n-Caproic acid vinyl ester	3050-69-9	974	+	+	+
XMW0299	Butanoic acid butyl ester	109-21-7	995	+	+	+
D269	2-methyl-Butanoic acid 2-methylpropyl ester	2445-67-2	1004	+	+	+
XMW1310	Isobutyl isovalerate	589-59-3	1005	+	+	+
D417	(E)-3-Hexen-1-ol acetate	3681-82-1	1005	+	+	+
KMW0196	(Z)-3-Hexen-1-ol acetate	3681-71-8	1009	+	+	+
KMW0204	Acetic acid hexyl ester	142-92-7	1014	+	+	+
XMW1209	Propanoic acid, 2-methyl-, 2-methylbutyl ester	2445-69-4	1016	+	+	+
XMW1221	(propylthio)-Acetic acid methyl ester	20600-65-1	1036	+	+	+
D309	trans-Ethyl 2-hexenoate	27829-72-7	1049	+	+	+
WMW0087	3-methylbutyl ester Butanoic Acid	106-27-4	1056	+	+	+
XMW1308	1-Octyl trifluoroacetate	2561-21-9	1059	+	+	+
D240	Propanoic acid, 2,2-dimethyl-, pentyl ester	2313-68-0	1063	+	+	+
w43	2-Oxepanone	502-44-3	1065	+	+	+
NMW0025	Acetic acid, phenyl ester	122-79-2	1067	+	+	+
XMW1227	(E)-2-Methylbut-2-en-1-yl methacrylate	88142-95-4	1088	+	+	+
KMW0267	Benzoic acid, methyl ester	93-58-3	1094	+	+	+
KMW0283	Hexanoic acid propyl ester	626-77-7	1097	+	+	+
XMW0969	2-methyl-2-Butenoic acid,2-methylpropyl ester	66917-61-1	1097	+	+	+
KMW0288	Heptanoic acid ethyl ester	106-30-9	1098	+	+	+
D305	2-methyl-Butanoic acid,3-methylbutyl ester	27625-35-0	1101	+	+	+
w32	Acetic acid heptyl ester	112-06-1	1112	+	+	+
XMW1127	Formic acid octyl ester	112-32-3	1114	+	+	+
XMW1226	Hexanoic acid 2-methylpropyl ester	105-79-3	1149	+	+	+
XMW0495	Dehydromevalonic lactone	2381-87-5	1169	+	+	+
D261	3-methyl-Butanethioic acid S-(1-methylpropyl) ester	2432-91-9	1174	+	+	+
XMW0607	2-phenylethyl esterFormic acid	104-62-1	1178	-	+	+
XMW1069	3-hexenyl acid Butanoic ester	53398-84-8	1185	-	+	+
KMW0366	(Z)-3-hexenyl ester Butanoic acid	16491-36-4	1187	-	+	+
KMW0381	Hexanoic acid butyl ester	626-82-4	1192	+	+	+
XMW0080	(Z)-3-Octen-1-ol,acetate	69668-83-3	1195	+	+	+
w31	(Z)-Butanoic acid,4-hexenyl ester	69727-41-9	1203	+	+	+
XMW0296	Acetic acid octyl ester	112-14-1	1210	-	+	+
KMW0411	3,7-dimethyl-1,6-Octadien-3-ol formate	115-99-1	1215	-	+	+
KMW0627	Benzoic acid, 1-methylethyl ester	939-48-0	1217	-	+	+
XMW1079	Butanoic acid,1-methylhexyl ester	39026-94-3	1218	+	+	+
WMW0216	Fenchyl acetate	13851-11-1	1224	+	+	+
KMW0449	formate1 endo-7,7-trimethyl-Bicyclo[221]heptan-2-ol	7492-41-3	1226	+	+	+
D416	Furfuryl pentanoate	36701-01-6	1232	+	+	+
KMW0429	Isobornyl formate	1200-67-5	1233	+	+	+
KMW0424	2-methyl-Butanoic acid hexyl ester	10032-15-2	1236	+	+	+
XMW1401	n-Valeric acid cis-3-hexenyl ester	35852-46-1	1237	+	+	+
XMW0933	Bicyclo[311]hept-2-en-6-ol, 2,7,7-trimethyl-, acetate, [1S-(1α,5α,6β)]-	50764-55-1	1239	+	+	+
NMW0008	Hexanedioic acid dimethyl ester	627-93-0	1243	+	+	+
D85	3-methyl-Butanoic acid hexyl ester	10032-13-0	1244	+	+	+
XMW1240	2-methylbutyl ester Hexanoic acid	2601-13-0	1247	+	+	+
D248	2-methyl-Propanoic acid heptyl ester	2349-13-5	1247	+	+	+
KMW0441	Benzeneacetic acid ethyl ester	101-97-3	1247	+	+	+
KMW0427	3-Mercaptohexyl acetate	136954-20-6	1248	+	+	+
XMW0213	Isopentyl hexanoate	2198-61-0	1250	+	+	+
XMW1244	Hexanoic acid pentyl ester	540-07-8	1287	+	+	+
KMW0481	Acetic acid nonyl ester	143-13-5	1309	-	+	+
XMW0952	3-methylbutanoate-4-Methylhexyl	1215127-80-2	1312	+	+	+
XMW0693	2,6-Octadienoic acid-3,7-dimethyl--methyl ester	2349-14-6	1323	+	+	+
WMW0181	Z-4-Decenoic acid methyl ester	7367-83-1	1323	+	+	+
XMW1089	cyclopentyl ester Hexanoic acid	5413-59-2	1325	+	+	+
XMW0280	Carbonic acid phenyl propyl ester	13183-16-9	1335	+	+	+
D436	Methyl p-tolyloxyacetate	38768-63-7	1381	+	+	+
KMW0558	1,5-Dimethyl-1-vinyl-4-hexenyl butyrate	78-36-4	1418	+	+	+
NMW0186	Cyclohexanepropanoic Acid, 2-propenyl ester	2705-87-5	1435	+	+	+
D246	(Z)-2-methyl-Propanoic acid 3,7-dimethyl-2,6-octadienyl ester	2345-24-6	1475	+	+	+
KMW0591	Butanoic acid, 1,7,7-trimethylbicyclo[221]hept-2-yl ester, endo-	13109-70-1	1476	+	+	+
KMW0585	Citronellyl isobutyrate	97-89-2	1483	+	+	+
D204	Pentyl octanoate	638-25-5	1484	+	+	+
D158	2-Phenoxyethyl isobutyrate	103-60-6	1488	+	+	+
D403	4-(1,1-dimethylethyl)-Benzeneacetic acid methyl ester	3549-23-3	1491	+	+	+
KMW0485	Undecanoic acid ethyl ester	627-90-7	1494	+	+	+
XMW0758	(Z,Z)-9,12-Octadecadienoic acid methyl ester	112-63-0	2093	+	+	+
NMW0001	(Z)-9-Octadecenoic acid methyl ester	112-62-9	2095	+	+	+
XMW0513	(Z,Z,Z)-9,12,15-Octadecatrienoic acid methyl ester	301-00-8	2099	+	+	+
Hydrocarbons
XMW1432	1,4-Dimethyl-1,4-pentadiene	4161-65-3	780	+	+	+
XMW1114	1-Octene	111-66-0	789	+	+	+
XMW0878	1-methyl-1,4-Cyclohexadiene	4313-57-9	790	+	+	+
KMW0079	Octane	111-65-9	800	+	+	+
XMW0279	E-1-Methoxy-4-hexene	134777-60-9	801	+	+	+
WMW0213	2,4-dimethyl-Heptane	2213-23-2	821	+	+	+
XMW0894	3-ethyl-2-methyl-Hexane	16789-46-1	845	+	+	+
XMW0884	4-methylene-5-Hexenal	17844-21-2	897	+	+	+
KMW0137	Nonane	111-84-2	900	+	+	+
XMW0519	Cyclobutanespiro-2'-bicyclo[110]butane-4'-spirocyclobutane	76308-11-7	930	+	+	+
XMW1300	butyl-Cyclopentane	2040-95-1	937	-	+	+
XMW0597	2-methyl-Nonane	871-83-0	964	+	+	+
XMW1229	Bicyclo(331)non-2-ene	6671-66-5	964	+	+	+
XMW1065	2,6,6-trimethyl-Octane	54166-32-4	966	+	+	+
XMW0023	4-methyl-1-(1-methylethyl)-Bicyclo[310]hex-2-ene	28634-89-1	966	-	+	+
XMW0202	cis-2,6-Dimethyl-2,6-octadiene	2492-22-0	985	+	+	+
w06	2,2,4,6,6-pentamethyl-Heptane	13475-82-6	990	+	+	+
KMW0208	Decane	124-18-5	1000	+	+	+
NMW0010	Dicyclopentadiene	77-73-6	1003	+	+	+
XMW0121	4,6,8-trimethyl-1-Nonene	54410-98-9	1012	+	+	+
XMW0649	2,6-dimethyl-Nonane	17302-28-2	1018	+	+	+
XMW0403	2,5-dimethyl Nonane	17302-27-1	1021	+	+	+
WMW0105	4,8-dimethyl-1,7-Nonadiene	62108-28-5	1026	+	+	+
WMW0126	3-ethyl-2-methyl-1,3-Hexadiene	61142-36-7	1031	+	+	+
XMW0416	5-butyl-1,3-Cyclohexadiene	30168-57-1	1043	+	+	+
WMW0214	4,5-dimethyl-Nonane	17302-23-7	1046	+	+	+
XMW0196	4-methyl-Decane	2847-72-5	1060	+	+	+
XMW0793	2,7-dimethyl-3,6-bis(methylene)-1,7-Octadiene	16714-60-6	1083	+	+	+
WMW0082	1,10-Undecadiene	13688-67-0	1095	+	+	+
KMW0306	Undecane	1120-21-4	1100	+	+	+
XMW0690	2,4-dimethyl-1-(1-methylethenyl)-Cyclohexene	56763-60-1	1108	+	+	+
D316	Adamantane	281-23-2	1116	-	+	+
XMW0941	exo-7-(trans-1-Propenyl)bicyclo[420]oct-1(2)-ene	107983-42-6	1140	+	+	+
XMW1315	4-methyl-Undecane	2980-69-0	1160	+	+	+
XMW0373	2-methyl-Undecane	7045-71-8	1164	+	+	+
XMW1337	3-methyl-5-propyl-Nonane	31081-18-2	1185	-	+	+
WMW0222	1-Dodecene	112-41-4	1190	+	+	+
XMW0602	5,7-dimethyl-Undecane	17312-83-3	1190	+	+	+
WMW0145	4,6-dimethyl-Undecane	17312-82-2	1196	+	+	+
KMW0406	Dodecane	112-40-3	1200	+	+	+
XMW0943	3,5-dimethyl-Undecane	17312-81-1	1207	+	+	+
XMW0367	2,4-dimethyl-Undecane	17312-80-0	1208	+	+	+
XMW0794	3-(1-methyl-2-propenyl)-1,5-Cyclooctadiene	16538-88-8	1209	-	+	+
XMW1379	1,5-dimethyl-2,6-bis(methylene)-Cyclooctane	74301-13-6	1215	-	+	+
XMW0420	2,9-dimethyl-Undecane	17301-26-7	1233	+	+	+
XMW0586	5-methyl-Dodecane	17453-93-9	1255	+	+	+
XMW0109	4-methyl-Dodecane	6117-97-1	1259	+	+	+
XMW1330	3-methyl-Dodecane	17312-57-1	1271	+	+	+
XMW0179	2,6,11-trimethyl-Dodecane	31295-56-4	1275	+	+	+
XMW0422	3,5-Dimethyldodecane	107770-99-0	1285	+	+	+
KMW0488	Tridecane	629-50-5	1300	+	+	+
XMW0110	4,6-dimethyl-Dodecane	61141-72-8	1325	+	+	+
KMW0551	Tetradecane	629-59-4	1400	+	+	+
XMW0200	4-methyl-Tetradecane	25117-24-2	1459	+	+	+
XMW0419	2-methyl-Tetradecane	1560-95-8	1463	+	+	+
XMW1356	2-methyl-6-propyl-Dodecane	55045-08-4	1483	+	+	+
XMW0097	8,8-dimethyl-9-methylene-1,5-Cycloundecadiene	62338-54-9	1485	+	+	+
XMW0265	2,6,10-trimethyl-Tetradecane	14905-56-7	1539	+	+	+
KMW0719	Eicosane	112-95-8	2000	+	+	+
Ketone
XMW1115	Isopropenyl ethyl ketone	25044-01-3	748	+	+	+
XMW0085	1-cyclopropyl-1-Propanone	6704-19-4	756	+	+	+
IS-04	3-Hexanone	24588-54-3	780	+	+	+
NMW0754	Acetylacetone	123-54-6	783	+	+	+
KMW0046	2-Hexanone	591-78-6	792	+	+	+
KMW0067	4-methyl-3-Penten-2-one	141-79-7	798	+	+	+
XMW0637	2,2,3-trimethyl-Cyclobutanone	1449-49-6	847	+	+	+
XMW0201	4-Hexen-3-one	2497-21-4	855	+	+	+
NMW0773	Cyclohexanone	108-94-1	894	+	+	+
KMW0113	2-Heptanone	110-43-0	895	+	+	+
KMW0135	3-Methyl-2-Cyclohexen-1-one	930-68-7	920	-	+	+
XMW0901	3-Chloro-2,4-pentanedione	1694-29-7	931	-	+	+
KMW0168	5-Methyl-(E)-2-hepten-4-one	102322-83-8	972	+	+	+
KMW0170	1-Octen-3-one	4312-99-6	976	+	+	+
WMW0205	2,5-Octanedione	3214-41-3	984	+	+	+
KMW0176	6-methyl-5-Hepten-2-one	110-93-0	986	+	+	+
XMW0177	1-(2-methyl-1-cyclopenten-1-yl)-Ethanone	3168-90-9	996	+	+	+
XMW0162	(Z)-4-(acetyloxy)-3-Penten-2-one	38365-58-1	1005	+	+	+
w41	(E)-3-Octen-2-one	18402-82-9	1035	+	+	+
XMW0486	2,2,6-trimethyl-Cyclohexanone	2408-37-9	1036	+	+	+
XMW1335	2,2,5-trimethyl-3,4-Hexanedione	20633-03-8	1039	+	+	+
XMW0900	3,5,5-trimethyl-3-Cyclohexen-1-one	471-01-2	1044	+	+	+
XMW0226	4,6-dimethyl-2-Heptanone	19549-80-5	1045	+	+	+
XMW0917	3-Nonen-5-one	82456-34-6	1052	+	+	+
D206	1,2-Cyclohexanedione	765-87-7	1062	+	+	+
KMW0233	Acetophenone	98-86-2	1065	+	+	+
XMW0186	(E,E)-3,5-Octadien-2-one	30086-02-3	1073	+	+	+
XMW0276	5-methyl-4-Hexen-3-one	13905-10-7	1080	+	+	+
XMW1442	methyl 2,2,3-trimethylcyclopentyl Ketone	17983-22-1	1092	+	+	+
XMW1218	3-(hydroxymethyl)-2-Nonanone	67801-33-6	1093	+	+	+
XMW0909	2,6,6-Trimethylbicyclo[320]hept-2-en-7-one	4613-37-0	1108	+	+	+
XMW0925	6-Camphenone	55659-42-2	1114	-	+	+
D413	4-Methyl-5-nonanone	35900-26-6	1116	+	+	+
XMW0008	Isophorone	78-59-1	1124	+	+	+
NMW0040	Benzyl methyl ketone	103-79-7	1124	+	+	+
XMW0896	6-methyl-5-Nonen-4-one	7036-98-8	1136	+	+	+
XMW0927	2,6,6-Trimethyl-2-cyclohexene-1,4-dione	1125-21-9	1145	+	+	+
XMW0676	1-(3-methylphenyl)-Ethanone	585-74-0	1182	+	+	+
NMW0070	1-phenyl-1,2-Propanedione	579-07-7	1183	-	+	+
XMW1465	6-methyl-3-(1-methylethyl)-7-Oxabicyclo[410]heptan-2-one	5286-38-4	1256	+	+	+
D390	2-(2-hexenyl)-Cyclopentanone	34687-46-2	1320	+	+	+
XMW0456	(E)-5,9-dimethyl-5,8-Decadien-2-one	130876-99-2	1320	+	+	+
D340	1-phenyl-3-Hexanone	29898-25-7	1427	+	+	+
XMW0244	4-(2,6,6-trimethyl-1-cyclohexen-1-yl)-2-Butanone	17283-81-7	1433	+	+	+
XMW0133	6-Methyl-6-(5-methylfuran-2-yl)heptan-2-one	50464-95-4	1433	+	+	+
WMW0049	(Z)-6,10-dimethyl-5,9-Undecadien-2-one	3879-26-3	1435	+	+	+
w40	6,7-Dodecanedione	13757-90-9	1486	+	+	+
KMW0736	Apocynin	498-02-2	1487	+	+	+
D349	8-Cyclohexadecen-1-one	3100-36-5	2072	+	+	+
Alcohol
KMW0051	2-methyl-1-Butanol	137-32-6	739	+	+	+
KMW0056	1-Pentanol	71-41-0	766	+	+	+
KMW0057	(Z)-2-Penten-1-ol	1576-95-0	768	+	+	+
D131	3-Pentyn-1-ol	10229-10-4	778	+	+	+
WMW0188	2-Pentyn-1-ol	6261-22-9	778	+	+	+
XMW0569	(R)-2-Hexanol	26549-24-6	780	+	+	+
WMW0187	2-Hexanol	626-93-7	801	+	+	+
KMW0092	2-Furanmethanol	98-00-0	851	+	+	+
KMW0098	(Z)-3-Hexen-1-ol	928-96-1	858	+	+	+
KMW0102	1-Hexanol	111-27-3	868	+	+	+
NMW0774	2-butoxy-Ethanol	111-76-2	907	+	+	+
XMW1307	1-methyl-Cyclohexanol	590-67-0	908	+	+	+
KMW0133	4-methyl-1-Hexanol	818-49-5	953	+	+	+
KMW0159	1-Heptanol	111-70-6	970	+	+	+
KMW0169	3-Mercapto-3-methylbutanol	34300-94-2	970	+	+	+
WMW0058	6-methyl-5-Hepten-2-ol	1569-60-4	994	+	+	+
KMW0194	2-Octanol	123-96-6	998	+	+	+
D298	(E)-2,5,5-trimethyl-3,6-Heptadien-2-ol	26127-98-0	1000	+	+	+
D373	(E,E)-2,4-Heptadien-1-ol	33467-79-7	1004	-	-	+
XMW0642	3,5-dimethyl-Cyclohexanol	5441-52-1	1030	+	+	+
KMW0219	2-ethyl-1-Hexanol	104-76-7	1030	+	+	+
KMW0323	Benzyl Alcohol	100-51-6	1036	+	+	+
D409	(S)-2,5-Dimethyl-3-vinylhex-4-en-2-ol	35671-15-9	1039	+	+	+
D387	3,5,5-trimethyl-1-Hexanol	3452-97-9	1047	+	+	+
WMW0127	(Z)-3-Octen-1-ol	20125-84-2	1055	+	+	+
NMW0022	α-methyl-Benzenemethanol	98-85-1	1061	+	+	+
KMW0276	1-Octanol	111-87-5	1072	-	+	+
WMW0104	Cyclooctanemethanol	3637-63-6	1073	-	-	+
XMW1233	3-Cyclopentyl-1-propanol	767-05-5	1102	+	+	+
NMW0038	4-methyl-Benzenemethanol	589-18-4	1106	+	+	+
XMW0411	2,6-dimethyl-Cyclohexanol	5337-72-4	1112	+	+	+
XMW0527	cis-1-methyl-4-(1-methylethyl)-2-Cyclohexen-1-ol	29803-82-5	1122	-	+	+
KMW0608	3-Mercaptohexanol	51755-83-0	1127	+	+	+
w01	Cyclooctyl Alcohol	696-71-9	1155	+	+	+
KMW0531	(E,Z)-3,6-Nonadien-1-ol	56805-23-3	1156	+	+	+
KMW0355	trans,cis-2,6-Nonadien-1-ol	28069-72-9	1170	+	+	+
KMW0344	1-Nonanol	143-08-8	1173	+	+	+
D348	cis-1-methyl-2-(1-methylethenyl)-Cyclobutaneethanol	30820-22-5	1183	-	+	+
XMW0443	(E)-2,6-Dimethylocta-3,7-diene-2,6-diol	51276-34-7	1191	+	+	+
XMW0911	1-Octen-1-ol acetate	77149-68-9	1191	+	+	+
XMW0122	(1α,2α,3α)-2-methyl-3-(1-methylethenyl)-Cyclohexanol	54244-81-4	1196	+	+	+
XMW1136	Lilac Alcohol C	33081-36-6	1219	-	+	+
D245	4-Phenyl-2-butanol	2344-70-9	1241	+	+	+
XMW0735	α-2-propenyl-Benzenemethanol	936-58-3	1244	+	+	+
XMW0364	6-Undecanol	23708-56-7	1277	+	+	+
XMW0511	3,7,11,15-Tetramethyl-2-hexadecen-1-ol	102608-53-7	2116	+	+	+
Aldehyde
WMW0199	(E)-2-methyl-2-Butenal	497-03-0	745	+	+	+
KMW0068	(Z)-3-Hexenal	6789-80-6	800	+	+	+
KMW0066	Hexanal	66-25-1	801	+	+	+
KMW0088	(E)-2-Hexenal	6728-26-3	854	+	+	+
NMW0769	3-methyl-Butanal oxime	626-90-4	864	+	+	+
KMW0123	(Z)-4-Heptenal	6728-31-0	900	+	+	+
KMW0122	Heptanal	111-71-7	903	+	+	+
KMW0129	(E,E)-2,4-Hexadienal	142-83-6	910	+	+	+
KMW0158	BenzAldehyde	100-52-7	960	+	+	+
XMW1118	CyclohexanecarboxAldehyde	2043-61-0	963	+	+	+
XMW0183	2-methyl-2-Heptenal	30567-26-1	990	+	+	+
WMW0047	5-Ethylcyclopent-1-enecarboxAldehyde	36431-60-4	1040	+	+	+
XMW3734	2-hydroxy-BenzAldehyde	90-02-8	1047	+	+	+
KMW0212	BenzeneacetAldehyde	122-78-1	1049	+	+	+
KMW0251	2,6-dimethyl-5-Heptenal	106-72-9	1054	+	+	+
KMW0243	(E)-2-Octenal	2548-87-0	1060	+	+	+
XMW0404	2,5-FurandicarboxAldehyde	823-82-5	1076	+	+	+
D313	(Z)-1-(1-ethoxyethoxy)-3-Hexene	28069-74-1	1102	+	+	+
D401	2-Isopropyl-5-methylhex-2-enal	35158-25-9	1106	+	+	+
D173	4-methyl-BenzeneacetAldehyde	104-09-6	1120	-	+	+
XMW0681	7-methyl-3-methylene-6-Octenal	55050-40-3	1147	+	+	+
KMW0345	(E,Z)-2,6-Nonadienal	557-48-2	1155	+	+	+
XMW0679	AcetAldehyde,tetramer	108-62-3	1160	+	+	+
KMW0343	2-Nonenal	2463-53-8	1161	+	+	+
KMW0338	(E)-2-Nonenal	18829-56-6	1162	+	+	+
WMW0061	2-ethyl-BenzAldehyde	22927-13-5	1176	+	+	+
KMW0361	4-ethyl-BenzAldehyde	4748-78-1	1180	-	+	+
XMW0255	2,4-dimethyl BenzAldehyde	15764-16-6	1182	+	+	+
XMW0089	(E)-4-Decenal	65405-70-1	1198	+	+	+
KMW0489	(S)-4-(1-methylethenyl)-1-Cyclohexene-1-carboxAldehyde	18031-40-8	1207	+	+	+
XMW0727	2,5-dimethyl BenzAldehyde	5779-94-2	1208	+	+	+
XMW0189	α,4-dimethyl-3-Cyclohexene-1-acetAldehyde	29548-14-9	1225	+	+	+
XMW0526	(Z)-(3,3-dimethylcyclohexylidene)-AcetAldehyde	26532-24-1	1226	+	+	+
D219	4-methoxy-BenzAldehyde	123-11-5	1251	+	+	+
NMW0136	3-hydroxy-BenzAldehyde	100-83-4	1327	+	+	+
D344	(E,E)-2,4-Undecadienal	30361-29-6	1430	+	+	+
NMW0216	3,4-dimethoxy-BenzAldehyde	120-14-9	1489	+	+	+
Aromatics
KMW0060	Toluene	108-88-3	763	+	+	+
XMW0312	Ethylbenzene	100-41-4	855	+	+	+
KMW0070	1,3-dimethyl-Benzene	108-38-3	866	+	+	+
KMW0112	o-Xylene	95-47-6	888	+	+	+
WMW0228	Anisole	100-66-3	921	-	+	+
NMW0778	(1-methylethyl)-Benzene	98-82-8	922	-	+	+
NMW0789	1-ethyl-3-methyl-Benzene	620-14-4	957	-	+	+
XMW0598	α-Methylstyrene	98-83-9	986	+	+	+
KMW0150	1,2,4-trimethyl-Benzene	95-63-6	990	+	+	+
NMW0794	(1-methylpropyl)-Benzene	135-98-8	1001	+	+	+
XMW0114	nitroso-Benzene	586-96-9	1005	+	+	+
NMW0012	1,2,3-trimethyl-Benzene	526-73-8	1013	+	+	+
WMW0227	1,4-dichloro-Benzene	106-46-7	1021	+	+	+
XMW0770	Indane	496-11-7	1029	+	+	+
XMW0011	1,4-diethyl-Benzene	105-05-5	1041	+	+	+
XMW0712	1-propynyl-Benzene	673-32-5	1052	-	+	+
XMW0659	Butylbenzene	104-51-8	1054	-	+	+
XMW0037	1-ethyl-3,5-dimethyl-Benzene	934-74-7	1059	+	+	+
XMW1123	2-ethyl-1,4-dimethyl-Benzene	1758-88-9	1076	+	+	+
XMW0895	1-methyl-Indan	767-58-8	1079	+	+	+
XMW0295	1-methyl-3-(1-methylethenyl)-Benzene	1124-20-5	1082	+	+	+
XMW0726	(1-methoxypropyl)-Benzene	59588-12-4	1104	+	+	+
KMW0273	1,2,4,5-tetramethyl-Benzene	95-93-2	1115	+	+	+
NMW0053	2-Phenylpropenal	4432-63-7	1152	-	+	+
KMW0404	Naphthalene	91-20-3	1182	+	+	+
XMW0539	3,4-Dimethoxytoluene	494-99-5	1233	+	+	+
XMW0835	1-methyl-2-(1-ethylpropyl)-Benzene	54410-74-1	1240	+	+	+
KMW0433	4-(2-propenyl)-Phenol	501-92-8	1255	-	+	+
WMW0172	trans-Anethole	4180-23-8	1283	+	+	+
XMW0662	2-methyl-Naphthalene	91-57-6	1297	+	+	+
XMW0706	3-methyl-1,1'-Biphenyl	643-93-6	1485	+	+	+
XMW0916	(5-bromopentyl)-Benzene	14469-83-1	1487	+	+	+
XMW0041	1,2-dimethoxy-4-(1-propenyl)-Benzene	93-16-3	1492	+	+	+
Amine
XMW1471	N-methyl-N-2-propenyl-1-ButanAmine	24209-62-9	856	+	+	+
NMW0013	Benzylamine	100-46-9	1019	+	+	+
NMW0035	N,N-dimethyl-BenzenAmine	121-69-7	1101	+	+	+
XMW0892	Propanediamide	108-13-4	1138	+	+	+
XMW1057	Methacrylamide	79-39-0	1149	+	+	+
NMW0057	Glutarimide	1121-89-7	1154	+	+	+
NMW0069	2,5-dimethyl-BenzenAmine	95-78-3	1171	-	+	+
XMW1409	(R)-(+)-1-(p-Tolyl)ethylAmine	4187-38-6	1185	-	+	+
XMW0124	m-Aminophenylacetylene	54060-30-9	1203	+	+	+
XMW0820	2-ethyl-BenzenAmine	578-54-1	1205	+	+	+
XMW1295	N,N,N',N'-tetramethyl-1,6-HexanediAmine	111-18-2	1206	+	+	+
XMW0711	N-phenyl-Formamide	103-70-8	1221	+	+	+
XMW0545	N-(1-methylethyl)-Benzenemethanamine	102-97-6	1226	+	+	+
NMW0111	N,α,α-trimethyl-BenzeneethanAmine	100-92-5	1275	+	+	+
XMW0063	p-Isopropoxyaniline	7664-66-6	1316	+	+	+
NMW0190	N-cyclohexyl-CyclohexanAmine	101-83-7	1443	+	+	+
NMW0218	Hordenine	539-15-1	1495	+	+	+
Phenol
KMW0175	Phenol	108-95-2	980	+	+	+
KMW0382	2-methyl-Phenol	95-48-7	1054	+	+	+
KMW0258	2-methoxy-Phenol	90-05-1	1089	+	+	+
NMW0047	2-ethyl-Phenol	90-00-6	1140	+	+	+
KMW0359	3-ethyl-Phenol	620-17-7	1169	-	-	+
XMW0300	3,5-dimethyl-Phenol	108-68-9	1171	-	+	+
XMW0791	4-methyl-2-nitro-Phenol	119-33-5	1250	+	+	+
D356	3-Methoxy-5-methylphenol	3209-13-0	1318	+	+	+
NMW0155	Propofol	2078-54-8	1364	+	+	+
XMW0455	4,5-dimethyl-1,3-Benzenediol	527-55-9	1490	+	+	+
NMW0453	1-hydroxy-9,10-Anthracenedione	129-43-1	2083	+	+	+
Acid
NMW0208	9-Oxononanoic Acid	2553-17-5	1483	+	+	+
XMW0026	Heptanoic Acid	111-14-8	1080	+	+	+
XMW0658	2-Heptenoic Acid	18999-28-5	1081	+	+	+
XMW1237	2,2-dimethyl-3-Pentenoic Acid	16642-52-7	997	+	+	+
KMW0101	2-methyl Butanoic Acid	116-53-0	861	+	+	+
NMW0209	Undecylenic Acid	112-38-9	1484	+	+	+
KMW0405	2-methyl-Propanoic Acid	79-31-2	765	+	+	+
NMW0781	4-hydroxy-Butanoic Acid	591-81-1	933	-	-	+
NMW0085	4-methyl-Benzoic Acid	99-94-5	1213	-	+	+
NMW0127	3,7-dimethyl-6-Octenoic Acid	502-47-6	1314	+	+	+
NMW0188	3-phenyl-2-Propenoic Acid	621-82-9	1435	+	+	+
Nitrogen compounds
XMW0670	2,2'-iminobis-Acetonitrile	628-87-5	1108	+	+	+
XMW1156	3-(1-methylethylidene) Cyclopentanecarbonitrile	89683-72-7	1166	+	+	+
D332	2-Nonenenitrile	29127-83-1	1194	+	+	+
XMW0762	Imidodicarbonic diamide	108-19-0	1237	+	+	+
D265	Dodecanenitrile	2437-25-4	1490	+	+	+
Sulfur compounds
NMW0767	Diallyl sulfur compounds	592-88-1	861	+	+	+
NMW0777	DiSulfur compounds methyl 2-propenyl	2179-58-0	920	-	+	+
WMW0085	Diethyl disulfur compounds	110-81-6	927	-	+	+
D98	(methylthio)-Benzene	100-68-5	1106	+	+	+
Others
XMW0485	Carbonochloridodithioic acid methyl ester	16696-91-6	1033	+	+	+
XMW0269	2-Methylbutanoic anhydride	1468-39-9	1190	+	+	+
KMW0206	5-(methylthio)-Pentanenitrile	59121-25-4	1207	+	+	+
Halogenated hydrocarbons
D95	(E)-1,3-dichloro-1-Propene	10061-02-6	763	+	+	+
WMW0120	1-iodo-Nonane	4282-42-2	1342	+	+	+
D377	1-chloro-Octadecane	3386-33-2	2070	+	+	+
Ether
XMW1389	2,3-Dimethylanisole	2944-49-2	1144	-	+	+
D76	Octanal dimethyl acetal	10022-28-3	1178	-	-	+
