# Supplementary material for: Molecular and metabolic insights into floral scent biosynthesis during flowering in Dendrobium chrysotoxum
Source: Front Plant Sci. 2022 Nov 28;13:1030492. doi: 10.3389/fpls.2022.1030492 (PMC9742519; doi:10.3389/fpls.2022.1030492)
Supplement: Supplementary file 7 [file Table_3.xlsx]

## Sheet: TableS2new
Supplementary Table 3. 153 DVOCs between different pairs of samples
Index	Compounds	Class	Bd vs Hf			Hf vs Fb			Bd vs Fb
			Type	Log2(fold change)	P-value	Type	Log2(fold change)	P-value	Type	Log2(fold change)	P-value
KMW0218	Eucalyptol	Terpenoids	Up	1.8649	1.21271e-06	Up	3.01834	1.62303e-08	Up	4.88324	3.89746e-08
KMW0198	α-Phellandrene	Terpenoids	Up	1.52402	1.65554e-08	Up	2.55604	2.37644e-06	Up	4.08006	1.46183e-06
KMW0223	Terpinene	Terpenoids	Up	2.02114	2.26395e-06	Up	3.01337	7.76972e-06	Up	5.03451	5.42776e-06
WMW0040	trans-β-Ocimene	Terpenoids	Up	1.24581	0.000293927	Up	3.9298	1.22837e-05	Up	5.17561	1.103e-05
XMW0127	o-Cymene	Terpenoids	Up	3.17496	1.0979e-06	Up	2.75587	8.31829e-07	Up	5.93083	6.38004e-07
KMW0329	Camphor	Terpenoids	Up	1.01541	1.11569e-05	Up	1.9004	8.51049e-08	Up	2.9158	7.13714e-08
KMW0148	α-Pinene	Terpenoids	Up	4.08264	0.000797461	Up	4.42179	6.46358e-06	Up	8.50443	6.38592e-06
XMW0013	Tricyclene	Terpenoids	Up	11.9053	0.000248343	Up	3.88737	1.05294e-05	Up	15.7927	9.46576e-06
XMW0889	4-methylene-1-(1-methylethyl)-Bicyclo[310]hex-2-ene	Terpenoids	Up	5.56224	7.56874e-07	Up	2.91447	7.25147e-07	Up	8.47671	5.23675e-07
XMW0678	1,5,5,6-tetramethyl-1,3-Cyclohexadiene	Terpenoids	Up	11.0051	6.51357e-05	Up	4.2471	7.5713e-06	Up	15.2522	6.43263e-06
KMW0178	Sabinene	Terpenoids	Up	11.2564	1.2812e-05	Up	3.78811	8.6771e-06	Up	15.0445	6.60758e-06
KMW0257	(1α,2β,5α)-2-methyl-5-(1-methylethyl)-Bicyclo[310]hexan-2-ol	Terpenoids	Up	1.11497	0.000129468	Up	2.20985	1.52684e-07	Up	3.32481	6.91988e-07
KMW0259	γ-Terpinene	Terpenoids	Up	16.0934	3.13388e-06	Up	2.90162	8.25456e-06	Up	18.995	5.00867e-06
XMW0780	E,E-2,6-Dimethyl-1,3,5,7-octatetraene	Terpenoids	Up	10.2493	4.70794e-05	Up	2.89994	0.000157239	Up	13.1492	8.87425e-05
WMW0015	4-Terpinenol	Terpenoids	Up	3.62508	4.54715e-06	Up	3.3016	3.55244e-07	Up	6.92669	3.56336e-07
XMW0654	1-(1,4-dimethylcyclohex-3-en-1-yl)Ethan-1-one	Terpenoids	Up	12.1165	2.04778e-06	Up	3.14519	4.70112e-08	Up	15.2617	7.56339e-08
NMW0064	Menthofurane	Terpenoids	Up	12.6738	1.78528e-06	Up	1.43023	6.28028e-11	Up	14.104	1.97005e-08
KMW0408	m-Methylbenzyl alcohol	Terpenoids	Up	9.72013	1.21287e-05	Up	2.7172	4.7072e-09	Up	12.4373	7.55798e-08
D307	Isopinocampheol	Terpenoids	Up	11.9555	2.08717e-07	Up	2.98797	1.02419e-06	Up	14.9435	6.31974e-07
WMW0011	5-methyl-2-(1-methylethenyl)-Cyclohexanone	Terpenoids	Up	13.1427	9.8801e-06	Up	3.35188	7.20511e-07	Up	16.4945	7.15482e-07
WMW0041	Isopinocarveol	Terpenoids	Up	12.4117	1.70555e-06	Up	3.20268	5.05132e-07	Up	15.6144	4.24207e-07
NMW0082	(-)-trans-Isopiperitenol	Terpenoids	Up	11.6535	2.66594e-05	Up	5.76958	2.21266e-06	Up	17.4231	2.05195e-06
KMW0433	4-(2-propenyl)-Phenol	Aromatics	Up	10.2847	6.13835e-06	Up	2.07955	1.38642e-07	Up	12.3643	4.59334e-07
NMW0012	1,2,3-trimethyl-Benzene	Aromatics	Up	1.83686	0.000106492	Up	2.99342	4.41767e-06	Up	4.83028	4.50021e-06
XMW0659	Butylbenzene	Aromatics	Up	14.7936	4.43898e-06	Up	3.1868	2.9982e-06	Up	17.9804	2.18014e-06
KMW0060	Toluene	Aromatics	Up	1.4362	7.66823e-12	Up	2.40268	1.09725e-06	Up	3.83887	5.30302e-07
XMW0895	1-methyl-Indan	Aromatics	Up	2.70125	6.21869e-08	Up	2.37137	2.53306e-07	Up	5.07262	1.85391e-07
XMW0037	1-ethyl-3,5-dimethyl-Benzene	Aromatics	Up	1.31074	4.9585e-06	Up	2.60321	1.32252e-06	Up	3.91395	1.17556e-06
WMW0228	Anisole	Aromatics	Up	10.7956	0.000505014	Up	4.34621	8.73714e-06	Up	15.1418	8.21488e-06
NMW0778	(1-methylethyl)-Benzene	Aromatics	Up	13.8505	0.000605721	Up	4.43994	5.69645e-06	Up	18.2904	5.61321e-06
NMW0789	1-ethyl-3-methyl-Benzene	Aromatics	Up	12.1406	8.50837e-07	Up	2.9272	5.20034e-07	Up	15.0678	4.02599e-07
NMW0794	(1-methylpropyl)-Benzene	Aromatics	Up	3.29606	1.22292e-05	Up	2.75467	1.96805e-07	Up	6.05073	4.12319e-07
XMW0114	nitroso-Benzene	Aromatics	Up	2.38275	7.16615e-12	Up	2.68287	1.025e-06	Up	5.06562	5.01395e-07
XMW0712	1-propynyl-Benzene	Aromatics	Up	10.3438	4.48954e-06	Up	3.85815	4.20637e-06	Up	14.2019	3.21855e-06
XMW0770	Indane	Aromatics	Up	2.46178	6.6776e-09	Up	2.55373	1.42181e-06	Up	5.0155	7.83262e-07
XMW0011	1,4-diethyl-Benzene	Aromatics	Up	1.99652	0.00029921	Up	4.08918	6.74877e-06	Up	6.0857	6.27382e-06
XMW0295	1-methyl-3-(1-methylethenyl)-Benzene	Aromatics	Up	2.79454	9.2851e-08	Up	2.57747	1.25515e-07	Up	5.37201	1.05161e-07
NMW0053	2-Phenylpropenal	Aromatics	Up	9.90159	4.93675e-06	Up	2.92166	7.92269e-08	Up	12.8232	1.60213e-07
KMW0188	2-Methyl-1,3-dithiacyclopentane	Heterocyclic compound	Up	1.85634	4.25741e-11	Up	2.39752	1.14744e-06	Up	4.25386	5.01489e-07
XMW0689	1-(3,5-dimethylpyrazinyl)-Ethanone,	Heterocyclic compound	Up	11.2348	8.84083e-05	Up	1.52239	9.70059e-07	Up	12.7572	3.44016e-06
XMW0442	βhistine	Heterocyclic compound	Up	16.06	2.96554e-06	Up	3.18983	2.02106e-07	Up	19.2498	2.25792e-07
KMW0244	2-methyl-5-(1-methylethyl)-Pyrazine	Heterocyclic compound	Up	2.50606	1.69597e-05	Up	3.0829	5.20035e-06	Up	5.58896	4.1102e-06
XMW0740	3-Methyl-pyrrolo(2,3-b)pyrazine	Heterocyclic compound	Up	10.5573	1.59109e-05	Up	2.5344	1.63371e-09	Up	13.0917	7.63123e-08
XMW1424	1H-1,2,3-Triazole	Heterocyclic compound	Up	9.1669	3.72091e-07	Up	4.32833	6.69774e-06	Up	13.4952	5.27242e-06
XMW0651	2,3-dimethyl-Pyridine	Heterocyclic compound	Up	3.77568	0.00116002	Up	4.45692	7.1361e-06	Up	8.2326	7.14946e-06
KMW0269	2,3-Dimethyl-5-ethylpyrazine	Heterocyclic compound	Up	9.15248	3.24086e-06	Up	2.00074	2.62166e-05	Up	11.1532	9.98958e-06
D323	2-methyl-3-(methylthio)-Pyrazine	Heterocyclic compound	Up	8.9706	2.49274e-05	Up	3.1895	1.98093e-07	Up	12.1601	3.80923e-07
XMW0487	6-nitro-2-Picoline	Heterocyclic compound	Up	13.623	4.21511e-06	Up	3.24598	1.25306e-07	Up	16.869	1.68184e-07
KMW0431	5H-5-Methyl-6,7-dihydrocyclopentapyrazine	Heterocyclic compound	Up	11.6959	3.88554e-06	Up	2.7425	3.03303e-09	Up	14.4384	3.53671e-08
KMW0481	Acetic acid nonyl ester	Ester	Up	10.3534	4.84565e-07	Up	2.40099	3.00405e-06	Up	12.7544	1.51755e-06
XMW1069	3-hexenyl acid Butanoic ester	Ester	Up	13.4586	7.7045e-06	Up	3.42007	2.3691e-07	Up	16.8786	2.82522e-07
KMW0366	(Z)-3-hexenyl ester Butanoic acid	Ester	Up	11.8153	2.03514e-06	Up	3.1201	3.12887e-08	Up	14.9354	5.91014e-08
KMW0627	Benzoic acid, 1-methylethyl ester	Ester	Up	11.5897	1.37232e-07	Up	3.75401	2.53391e-08	Up	15.3437	2.29869e-08
XMW0607	2-phenylethyl esterFormic acid	Ester	Up	9.46854	0.000107859	Up	2.54325	1.24682e-10	Up	12.0118	8.33437e-08
XMW0296	Acetic acid octyl ester	Ester	Up	9.7687	6.42789e-05	Up	6.28787	2.07526e-06	Up	16.0566	1.96981e-06
D371	(Z)-3-Hexen-1-ol formate	Ester	Up	3.40495	0.000986061	Up	4.45544	5.33522e-06	Up	7.86039	5.41289e-06
NMW0782	2-methyl-2-Butenoic acid ethyl ester	Ester	Up	10.7488	8.72238e-05	Up	4.50124	1.1512e-05	Up	15.25	9.84473e-06
KMW0411	3,7-dimethyl-1,6-Octadien-3-ol formate	Ester	Up	10.2928	4.51047e-06	Up	3.76138	5.90479e-08	Up	14.0542	7.65925e-08
XMW1337	3-methyl-5-propyl-Nonane	Hydrocarbons	Up	10.913	3.49346e-06	Up	2.50142	6.95642e-06	Up	13.4144	4.02078e-06
D316	Adamantane	Hydrocarbons	Up	9.78787	1.74032e-05	Up	2.91376	1.8816e-08	Up	12.7016	1.24102e-07
XMW0519	Cyclobutanespiro-2'-bicyclo[110]butane-4'-spirocyclobutane	Hydrocarbons	Up	4.07249	0.000952188	Up	4.3975	5.43404e-06	Up	8.46999	5.57378e-06
XMW1300	butyl-Cyclopentane	Hydrocarbons	Up	11.4568	0.000471314	Up	4.5832	8.51554e-06	Up	16.04	7.89549e-06
XMW0023	4-methyl-1-(1-methylethyl)-Bicyclo[310]hex-2-ene	Hydrocarbons	Up	11.2113	2.49229e-05	Up	3.85786	5.83631e-06	Up	15.0691	4.71777e-06
XMW0794	3-(1-methyl-2-propenyl)-1,5-Cyclooctadiene	Hydrocarbons	Up	12.1564	3.28818e-07	Up	3.77942	5.40961e-09	Up	15.9358	7.29048e-09
XMW1379	1,5-dimethyl-2,6-bis(methylene)-Cyclooctane	Hydrocarbons	Up	10.0717	8.11344e-06	Up	4.12721	1.32368e-10	Up	14.1989	1.75824e-09
XMW0676	1-(3-methylphenyl)-Ethanone	Ketone	Up	5.15814	2.60634e-06	Up	2.65112	2.11911e-09	Up	7.80926	2.76025e-08
XMW0925	6-Camphenone	Ketone	Up	10.6836	2.35871e-05	Up	2.12178	1.86045e-06	Up	12.8054	2.69468e-06
NMW0070	1-phenyl-1,2-Propanedione	Ketone	Up	12.4087	1.38063e-06	Up	2.63888	3.77279e-08	Up	15.0475	8.4497e-08
KMW0135	3-Methyl-2-Cyclohexen-1-one	Ketone	Up	11.3229	0.000339679	Up	4.5215	1.0424e-05	Up	15.8444	9.39997e-06
XMW0901	3-Chloro-2,4-pentanedione	Ketone	Up	9.31723	8.92733e-05	Up	3.1432	1.244e-08	Up	12.4604	1.63123e-07
XMW0255	2,4-dimethyl BenzAldehyde	Aldehyde	Up	1.38509	0.000243577	Up	1.37805	9.18901e-08	Up	2.76314	4.20791e-07
KMW0212	BenzeneacetAldehyde	Aldehyde	Up	1.81546	8.51379e-05	Up	4.43308	7.52181e-06	Up	6.24854	6.68906e-06
D173	4-methyl-BenzeneacetAldehyde	Aldehyde	Up	9.9276	3.21381e-05	Up	1.92691	1.60661e-07	Up	11.8545	1.08361e-06
KMW0361	4-ethyl-BenzAldehyde	Aldehyde	Up	12.3487	4.13158e-07	Up	2.31318	4.91553e-08	Up	14.6619	8.10728e-08
KMW0276	1-Octanol	Alcohol	Up	13.4725	9.90986e-06	Up	1.56732	6.04262e-05	Up	15.0399	1.76328e-05
D348	cis-1-methyl-2-(1-methylethenyl)-Cyclobutaneethanol	Alcohol	Up	13.1514	2.93224e-06	Up	3.34278	2.98209e-07	Up	16.4942	2.91414e-07
XMW1136	Lilac Alcohol C	Alcohol	Up	11.7024	1.55253e-06	Up	4.87096	2.8678e-06	Up	16.5733	2.45319e-06
XMW1409	(R)-(+)-1-(p-Tolyl)ethylAmine	Amine	Up	10.3526	2.19248e-05	Up	2.63526	1.03536e-09	Up	12.9879	6.70609e-08
NMW0069	2,5-dimethyl-BenzenAmine	Amine	Up	13.8402	1.40176e-06	Up	3.07543	3.94314e-08	Up	16.9156	6.33498e-08
NMW0777	DiSulfur compounds methyl 2-propenyl	Sulfur compounds	Up	9.73455	0.000808564	Up	4.27499	6.46677e-06	Up	14.0095	6.60224e-06
WMW0085	Diethyl disulfur compounds	Sulfur compounds	Up	10.8981	0.000555338	Up	4.49808	6.60135e-06	Up	15.3962	6.33472e-06
XMW1389	2,3-Dimethylanisole	Ether	Up	9.9838	1.48197e-05	Up	2.96029	1.41649e-07	Up	12.9441	3.1449e-07
XMW0300	3,5-dimethyl-Phenol	Phenol	Up	10.6769	1.10335e-05	Up	2.93932	8.139e-09	Up	13.6162	6.75736e-08
NMW0085	4-methyl-Benzoic Acid	Acid	Up	13.1167	5.28522e-07	Up	3.56267	5.87744e-09	Up	16.6794	9.79239e-09
KMW0296	Terpinolene	Terpenoids	Insig	-	-	Up	2.21732	4.74776e-06	Up	3.14591	2.15081e-06
NMW0071	L-α-Terpineol	Terpenoids	Insig	-	-	Up	1.75018	1.67478e-07	Up	2.54491	8.39723e-08
NMW0089	(R)-(+)-β-Citronellol	Terpenoids	Insig	-	-	Up	16.5827	5.8916e-06	Up	16.5827	5.8916e-06
WMW0201	7,7-dimethyl-2-methylene-Bicyclo[221]heptane	Terpenoids	Insig	-	-	Up	3.20525	3.46452e-07	Up	4.12292	2.87782e-07
XMW0719	p-Mentha-1,5,8-triene	Terpenoids	Insig	-	-	Up	1.0274	3.2693e-07	Up	1.18645	4.20785e-07
XMW0766	5-methyl-2-(1-methylethylidene)-Cyclohexanone	Terpenoids	Insig	-	-	Up	12.7707	1.65035e-06	Up	12.7707	1.65035e-06
XMW0726	(1-methoxypropyl)-Benzene	Aromatics	Insig	-	-	Up	1.66857	1.40643e-06	Up	1.91851	8.17891e-07
KMW0150	1,2,4-trimethyl-Benzene	Aromatics	Insig	-	-	Up	1.71596	5.17987e-06	Up	2.54412	2.03075e-06
KMW0144	Hexanoic acid methyl ester	Ester	Insig	-	-	Up	11.6704	3.8551e-06	Up	11.6704	3.8551e-06
KMW0183	2-ethyl-5-methyl-Pyrazine	Heterocyclic compound	Insig	-	-	Up	1.02446	4.56561e-07	Up	1.59865	3.33571e-08
XMW0522	3-propyl Pyridine	Heterocyclic compound	Insig	-	-	Up	1.76755	4.32103e-06	Up	2.6749	1.95391e-06
XMW0898	4-Isobutylpyrimidine	Heterocyclic compound	Insig	-	-	Up	1.54608	5.5279e-05	Up	2.09576	3.20919e-05
D365	2-Acetyl-3-ethylpyrazine	Heterocyclic compound	Insig	-	-	Up	1.45955	1.2251e-07	Up	2.08132	1.2674e-08
KMW0168	5-Methyl-(E)-2-hepten-4-one	Ketone	Insig	-	-	Up	2.91127	3.72938e-06	Up	3.40937	4.45445e-06
XMW0416	5-butyl-1,3-Cyclohexadiene	Hydrocarbons	Insig	-	-	Up	3.36066	1.49391e-05	Up	4.1667	1.27306e-05
XMW0943	3,5-dimethyl-Undecane	Hydrocarbons	Insig	-	-	Up	4.09017	9.57328e-06	Up	4.44136	8.74028e-06
XMW0367	2,4-dimethyl-Undecane	Hydrocarbons	Insig	-	-	Up	2.7371	1.53401e-06	Up	2.89684	2.00584e-06
XMW0793	2,7-dimethyl-3,6-bis(methylene)-1,7-Octadiene	Hydrocarbons	Insig	-	-	Up	1.7317	1.93034e-06	Up	2.30378	2.18233e-06
NMW0781	4-hydroxy-Butanoic Acid	Acid	Insig	-	-	Up	12.5924	9.76211e-06	Up	12.5924	9.76211e-06
NMW0127	3,7-dimethyl-6-Octenoic Acid	Acid	Insig	-	-	Up	1.28131	5.02204e-06	Up	1.45222	1.21698e-05
XMW3734	2-hydroxy-BenzAldehyde	Aldehyde	Insig	-	-	Up	2.21936	1.44426e-05	Up	2.73405	1.1389e-05
D76	Octanal dimethyl acetal	Ether	Insig	-	-	Up	10.3126	4.70676e-06	Up	10.3126	4.70676e-06
KMW0359	3-ethyl-Phenol	Phenol	Insig	-	-	Up	12.1516	4.41491e-07	Up	12.1516	4.41491e-07
D373	(E,E)-2,4-Heptadien-1-ol	Alcohol	Insig	-	-	Up	14.7951	3.90271e-07	Up	14.7951	3.90271e-07
KMW0169	3-Mercapto-3-methylbutanol	Alcohol	Insig	-	-	Up	1.74309	1.79267e-05	Up	1.64373	3.01219e-06
WMW0104	Cyclooctanemethanol	Alcohol	Insig	-	-	Up	15.0666	1.47326e-05	Up	15.0666	1.47326e-05
NMW0013	Benzylamine	Amine	Insig	-	-	Up	1.89217	1.26455e-05	Up	2.71851	8.51812e-06
KMW0206	5-(methylthio)-Pentanenitrile	Others	Insig	-	-	Up	4.0732	2.39207e-06	Up	4.7624	2.28156e-06
XMW0521	2-methyl-6-methylene-1,7-Octadiene	Terpenoids	Up	2.24836	0.000127293	Insig	-	-	Up	2.94033	1.03035e-05
XMW0149	4,5-dihydro-5,5-dimethyl-1H-Pyrazole	Heterocyclic compound	Up	2.44421	7.46022e-05	Insig	-	-	Up	3.18553	1.67312e-05
XMW1454	Isomaltol	Heterocyclic compound	Up	1.69829	3.79948e-05	Insig	-	-	Up	2.41605	8.03726e-06
KMW0558	1,5-Dimethyl-1-vinyl-4-hexenyl butyrate	Ester	Up	1.018	8.6491e-06	Insig	-	-	Up	1.07298	1.23242e-10
NMW0186	Cyclohexanepropanoic Acid, 2-propenyl ester	Ester	Up	1.10755	4.31989e-05	Insig	-	-	Up	1.08129	2.74031e-09
D340	1-phenyl-3-Hexanone	Ketone	Up	1.04221	8.18328e-06	Insig	-	-	Up	1.0629	1.51664e-09
XMW0244	4-(2,6,6-trimethyl-1-cyclohexen-1-yl)-2-Butanone	Ketone	Up	1.16985	1.7172e-05	Insig	-	-	Up	1.18207	2.92701e-09
KMW0176	6-methyl-5-Hepten-2-one	Ketone	Up	1.82189	7.37452e-06	Insig	-	-	Up	2.49734	4.5755e-06
D356	3-Methoxy-5-methylphenol	Phenol	Up	1.03477	3.24852e-06	Insig	-	-	Up	1.78341	1.28423e-07
XMW0527	cis-1-methyl-4-(1-methylethyl)-2-Cyclohexen-1-ol	Alcohol	Up	10.7741	0.262754	Insig	-	-	Up	11.3795	4.29651e-08
NMW0093	D-Verbenone	Terpenoids	Insig	-	-	Insig	-	-	Up	1.15411	8.00322e-06
XMW0164	Theaspirane	Terpenoids	Insig	-	-	Insig	-	-	Up	1.5935	3.46434e-08
NMW0001	(Z)-9-Octadecenoic acid methyl ester	Ester	Insig	-	-	Insig	-	-	Up	1.82851	0.00256518
XMW0758	(Z,Z)-9,12-Octadecadienoic acid methyl ester	Ester	Insig	-	-	Insig	-	-	Up	1.81753	0.00315455
XMW0513	(Z,Z,Z)-9,12,15-Octadecatrienoic acid methyl ester	Ester	Insig	-	-	Insig	-	-	Up	1.6314	0.000314922
KMW0255	3-Methoxy-2,5-dimethylpyrazine	Heterocyclic compound	Insig	-	-	Insig	-	-	Up	1.27496	1.94187e-07
XMW1064	(1α,4α,4aα,5aα)-4,4a,5,5a-tetrahydro-6,6-dimethyl-1,4-Methano-1H-Cyclopropa[d]pyridazine	Heterocyclic compound	Insig	-	-	Insig	-	-	Up	1.01112	6.50302e-06
XMW0539	3,4-Dimethoxytoluene	Aromatics	Insig	-	-	Insig	-	-	Up	1.02521	1.29021e-05
D349	8-Cyclohexadecen-1-one	Ketone	Insig	-	-	Insig	-	-	Up	1.80347	0.00239679
XMW0927	2,6,6-Trimethyl-2-cyclohexene-1,4-dione	Ketone	Insig	-	-	Insig	-	-	Up	1.43384	1.87782e-09
XMW0690	2,4-dimethyl-1-(1-methylethenyl)-Cyclohexene	Hydrocarbons	Insig	-	-	Insig	-	-	Up	1.03763	7.46082e-07
XMW0727	2,5-dimethyl BenzAldehyde	Aldehyde	Insig	-	-	Insig	-	-	Up	1.77679	1.18224e-06
XMW0526	(Z)-(3,3-dimethylcyclohexylidene)-AcetAldehyde	Aldehyde	Insig	-	-	Insig	-	-	Up	1.01527	1.19483e-05
KMW0158	BenzAldehyde	Aldehyde	Insig	-	-	Insig	-	-	Up	1.24029	3.41221e-08
XMW0183	2-methyl-2-Heptenal	Aldehyde	Insig	-	-	Insig	-	-	Up	1.0768	1.54814e-05
XMW0189	α,4-dimethyl-3-Cyclohexene-1-acetAldehyde	Aldehyde	Insig	-	-	Insig	-	-	Up	1.18138	0.0001159
D377	1-chloro-Octadecane	Halogenated hydrocarbons	Insig	-	-	Insig	-	-	Up	1.84885	0.00256272
NMW0453	1-hydroxy-9,10-Anthracenedione	Phenol	Insig	-	-	Insig	-	-	Up	1.85842	0.00408892
XMW0642	3,5-dimethyl-Cyclohexanol	Alcohol	Insig	-	-	Insig	-	-	Up	1.49496	1.06286e-08
XMW0511	3,7,11,15-Tetramethyl-2-hexadecen-1-ol	Alcohol	Insig	-	-	Insig	-	-	Up	1.84458	0.00257825
NMW0188	3-phenyl-2-Propenoic Acid	Acid	Up	1.00769	7.9652e-05	Insig	-	-	Insig	-	-
XMW0573	1,5-Diazabicyclo[310]hexane	Heterocyclic compound	Insig	-	-	Insig	-	-	Down	-1.0325	0.00119274
XMW0177	1-(2-methyl-1-cyclopenten-1-yl)-Ethanone	Ketone	Insig	-	-	Insig	-	-	Down	-1.03291	0.000930051
KMW0251	2,6-dimethyl-5-Heptenal	Aldehyde	Insig	-	-	Down	-1.00482	0.00784504	Insig	-	-
NMW0022	α-methyl-Benzenemethanol	Alcohol	Insig	-	-	Down	-1.2126	0.00308038	Insig	-	-
NMW0010	Dicyclopentadiene	Hydrocarbons	Insig	-	-	Down	-1.00893	7.84916e-05	Down	-1.09672	0.000809176
WMW0042	Pinocarveol	Terpenoids	Insig	-	-	Down	-1.11178	1.58424e-05	Down	-1.02102	0.000353809
XMW0483	1H-Pyrrole-2-carboxAldehyde	Heterocyclic compound	Insig	-	-	Down	-1.71195	1.07805e-05	Down	-2.06457	0.000159768
XMW1335	2,2,5-trimethyl-3,4-Hexanedione	Ketone	Insig	-	-	Down	-1.06086	1.53539e-08	Down	-1.0804	1.20226e-06
KMW0196	(Z)-3-Hexen-1-ol acetate	Ester	Insig	-	-	Down	-1.36979	5.79359e-05	Down	-1.70676	2.66457e-05
KMW0219	2-ethyl-1-Hexanol	Alcohol	Insig	-	-	Down	-1.08709	1.33161e-07	Down	-1.10818	9.52989e-07
